# Supplementary material for: Comparison of Efavirenz and Doravirine Developmental Toxicity in an Embryo Animal Model
Source: MDPI journal article supplement (doi:10.3390/ijms241411664), 2023-07-19
Supplement: s1 [file s1]

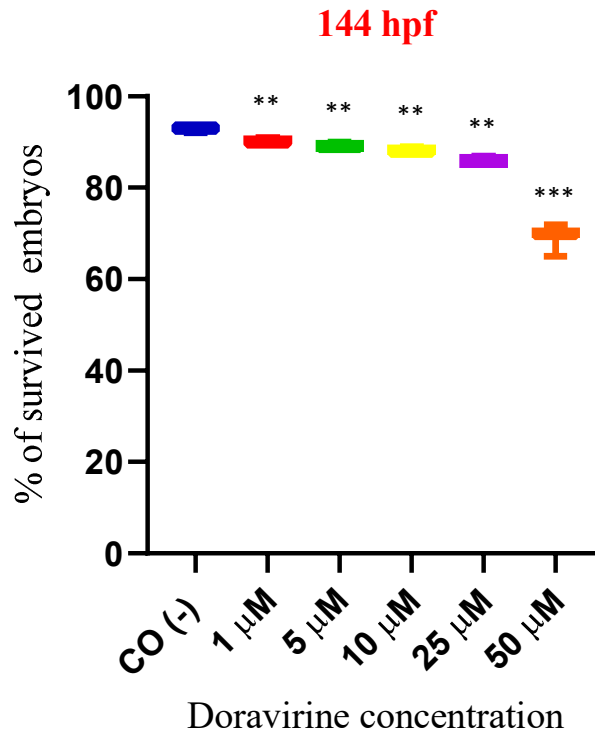

**Figure S1.** Survival rate of dechorionated zebrafish embryos at 144 hours post fertilization (hpf) after exposure to doravirine (DOR) at gastrula stage (4 hpf) by the immersion method. CO (-) represents embryos exposed to drug solvent only (fish water plus 0.1% dimethyl sulfoxide, DMSO). X-axis shows drug doses used for exposure of embryos; Y-axis shows the corresponding survival percentages. Results are expressed as mean  $\pm$  SD of three independent experiments, with 30 embryos for each experiment and each treatment. (\*\*  $p < 0.005$  vs. control group; \*\*\*  $p < 0.001$  vs. control group)

**Table S1.** Primers used in RT-PCR experiments.

| gene              | primer sequence          |
|-------------------|--------------------------|
| <i>pparg</i> for  | CCTGTCCGGGAAGACCAGCG     |
| <i>pparg</i> rev  | GTGCTCGTGGAGCGGCATGT     |
| <i>srebfl</i> for | CATCCACATGGCTCTGAGTG     |
| <i>srebfl</i> rev | CTCATCCACAAAGAAGCGGT     |
| <i>cebpa</i> for  | AACGGAGCGAGCTTGACTT      |
| <i>cebpa</i> rev  | AAATCATGCCCATTAGCTGC     |
| <i>rpl13a</i> for | TCTGGAGGACTGTAAGAGGTATGC |
| <i>rpl13a</i> rev | AGACGCACAATCTTGAGAGCAG   |
